# Supplementary material for: Serum and Fecal 3-Bromotyrosine Concentrations in Dogs with Chronic Inflammatory Enteropathy: Clinical Parameters and Histopathological Changes
Source: MDPI journal article supplement (doi:10.3390/ani13172804), 2023-09-04
Supplement: s1 [file s1]

TAMU GI Lab – Canine Chronic Enteropathy Clinical Activity Index

Date of evaluation: \_\_\_\_\_

Name of dog: \_\_\_\_\_

Breed: \_\_\_\_\_ Weight (lbs.): \_\_\_\_\_

Age/DOB: \_\_\_\_\_ Sex (circle): male neutered female spayed

Name of owner: \_\_\_\_\_

Clinic/Hospital: \_\_\_\_\_

Dog evaluated by: \_\_\_\_\_

| Evaluation of:               | score (circle)                                        | Specify, if applicable |
|------------------------------|-------------------------------------------------------|------------------------|
| <b>Attitude/activity</b>     | 0 normal                                              |                        |
|                              | 1 slightly decreased                                  |                        |
|                              | 2 moderately decreased                                |                        |
|                              | 3 severely decreased                                  |                        |
| <b>Appetite</b>              | 0 normal                                              |                        |
|                              | 1 slightly decreased                                  |                        |
|                              | 2 moderately decreased                                |                        |
|                              | 3 severely decreased                                  |                        |
| <b>Vomiting</b>              | 0 normal                                              |                        |
|                              | 1 mild (1x per week)                                  |                        |
|                              | 2 moderate (2-3x per week)                            |                        |
|                              | 3 severe (>3x per week)                               |                        |
| <b>Stool consistency</b>     | 0 normal                                              |                        |
|                              | 1 slightly soft feces, or fecal blood, mucus, or both | (please circle)        |
|                              | 2 very soft feces                                     |                        |
|                              | 3 watery diarrhea                                     |                        |
| <b>Stool frequency</b>       | 0 normal                                              |                        |
|                              | 1 slightly increased (2-3x per day)                   |                        |
|                              | 2 moderately increased (4-5x per day)                 |                        |
|                              | 3 severely increased (>5x per day)                    |                        |
| <b>Weight loss</b>           | 0 none                                                |                        |
|                              | 1 mild (<5%)                                          | loss: _____ lbs/kg     |
|                              | 2 moderate (5-10%)                                    |                        |
|                              | 3 severe (>10%)                                       |                        |
| <b>Albumin concentration</b> | 0 Albumin > 2.0 g/dL                                  |                        |
|                              | 1 Albumin 1.5-1.99 g/dL                               |                        |
|                              | 2 Albumin 1.2-1.49 g/dL                               |                        |
|                              | 3 Albumin <1.2 g/dL                                   |                        |

|                                     |   |                                                           |                            |
|-------------------------------------|---|-----------------------------------------------------------|----------------------------|
| <b>Ascites and peripheral edema</b> | 0 | none                                                      |                            |
|                                     | 1 | mild ascites or peripheral edema                          |                            |
|                                     | 2 | moderate amount of ascites/peripheral edema               |                            |
|                                     | 3 | severe ascites/pleural effusion and peripheral edema      |                            |
| <b>Pruritus</b>                     | 0 | no pruritus                                               | Changes in hair/coat/skin? |
|                                     | 1 | occasional episodes of itching                            |                            |
|                                     | 2 | regular episodes of itching, but stops when dog is asleep |                            |
|                                     | 3 | dog regularly wakes up because of itching                 |                            |

## Additional parameters

|                                                 |                            |                      |  |
|-------------------------------------------------|----------------------------|----------------------|--|
| <b>Water intake</b>                             |                            | normal               |  |
|                                                 |                            | decreased            |  |
|                                                 |                            | moderately increased |  |
|                                                 |                            | severely increased   |  |
| <b>Urination amount</b>                         |                            | normal               |  |
|                                                 |                            | decreased            |  |
|                                                 |                            | moderately increased |  |
|                                                 |                            | severely increased   |  |
| <b>Flatulence</b>                               |                            | normal               |  |
|                                                 |                            | mild                 |  |
|                                                 |                            | moderate             |  |
|                                                 |                            | severe               |  |
| <b>Serum cobalamin concentration (if known)</b> | _____ ng/L on _____ (date) |                      |  |

|                                                                                                                                            |                                                      |                         |
|--------------------------------------------------------------------------------------------------------------------------------------------|------------------------------------------------------|-------------------------|
| <b>clinical signs</b>                                                                                                                      | When was the first time of clinical signs?           | / (mm/yy)               |
|                                                                                                                                            | How long has this patient having the clinical signs? | (wk • mth • yr)         |
| Was this patient on any <b>immunosuppressive drugs</b> at the time of sample collection?                                                   |                                                      | Yes / No                |
| Please list all <b>immunosuppressive drugs</b> given up to 6 months prior to sample collection*.                                           | Drug name:                                           | Dose:                   |
|                                                                                                                                            | Regimen(i.e. q8h):                                   | Start date: End date**: |
|                                                                                                                                            | Drug name:                                           | Dose:                   |
|                                                                                                                                            | Regimen(i.e. q8h):                                   | Start date: End date**: |
|                                                                                                                                            | Drug name:                                           | Dose:                   |
|                                                                                                                                            | Regimen(i.e. q8h):                                   | Start date: End date**: |
|                                                                                                                                            | Drug name:                                           | Dose:                   |
|                                                                                                                                            | Regimen(i.e. q8h):                                   | Start date: End date**: |
| Was this patient on any <b>antibiotic drugs</b> before/at the time of sample collection?                                                   |                                                      | Yes / No                |
| Please list all <b>antibiotics</b> given up to 6 months prior to sample collection*.                                                       | Drug name:                                           | Dose:                   |
|                                                                                                                                            | Regimen(i.e. q8h):                                   | Start date: End date**: |
|                                                                                                                                            | Drug name:                                           | Dose:                   |
|                                                                                                                                            | Regimen(i.e. q8h):                                   | Start date: End date**: |
|                                                                                                                                            | Drug name:                                           | Dose:                   |
|                                                                                                                                            | Regimen(i.e. q8h):                                   | Start date: End date**: |
|                                                                                                                                            | Drug name:                                           | Dose:                   |
|                                                                                                                                            | Regimen(i.e. q8h):                                   | Start date: End date**: |
| Please tell us about <b>cobalamin</b> supplementation given up to 6 months prior to sample collection*.                                    | Drug name:                                           | Dose:                   |
|                                                                                                                                            | Regimen(i.e. q8h):                                   | Start date: End date**: |
|                                                                                                                                            | Drug name:                                           | Dose:                   |
|                                                                                                                                            | Regimen(i.e. q8h):                                   | Start date: End date**: |
| Please list all <b>additional medications</b> (including supplements and nutraceuticals) given up to 6 months prior to sample collection*. | Drug name:                                           | Dose:                   |
|                                                                                                                                            | Regimen(i.e. q8h):                                   | Start date: End date**: |
|                                                                                                                                            | Drug name:                                           | Dose:                   |
|                                                                                                                                            | Regimen(i.e. q8h):                                   | Start date: End date**: |
|                                                                                                                                            | Drug name:                                           | Dose:                   |
|                                                                                                                                            | Regimen(i.e. q8h):                                   | Start date: End date**: |
|                                                                                                                                            | Drug name:                                           | Dose:                   |
|                                                                                                                                            | Regimen(i.e. q8h):                                   | Start date: End date**: |

\*Please list beginning with the most recent drugs.

\*\*If a patient is currently on this drug, please leave "End date" blank.
